# Supplementary material
Source: MDPI journal article supplement (https://www.mdpi.com/2073-4433/14/5/880)
Supplement: s1 [file s1]

## Article

# Chemical Characterization and Source Apportionment of PM<sub>10</sub> Using Receptor Models over the Himalayan Region of India

Nikki Choudhary <sup>1,2</sup>, Akansha Rai <sup>1,2</sup>, Jagdish Chandra Kuniyal <sup>3</sup>, Priyanka Srivastava <sup>4</sup>, Renu Lata <sup>5</sup>, Monami Dutta <sup>6</sup>, Abhinandan Ghosh <sup>7</sup>, Supriya Dey <sup>8</sup>, Sayantan Sarkar <sup>8</sup>, Sakshi Gupta <sup>1,2</sup>, Sheetal Chaudhary <sup>3</sup>, Isha Thakur <sup>5</sup>, Archana Bawari <sup>3</sup>, Manish Naja <sup>4</sup>, Narayanasamy Vijayan <sup>1,2</sup>, Abhijit Chatterjee <sup>6</sup>, Tuhin Kumar Mandal <sup>1,2</sup>, Sudhir Kumar Sharma <sup>1,2,\*</sup> and Ravindra Kumar Kotnala <sup>1,2</sup>

<sup>1</sup> CSIR-National Physical Laboratory, Dr. K. S. Krishnan Road, New Delhi 110012, India; nikkichoudhary1607@gmail.com (N.C.); akansharai.may@gmail.com (A.R.); sakshigupta21096@gmail.com (S.G.); nvijayan@nplindia.org (N.V.); tuhinkumarmandal@gmail.com (T.K.M.); rkkotnala@gmail.com (R.K.K.)

<sup>2</sup> Academy of Scientific and Innovative Research (AcSIR), Ghaziabad 201002, India

<sup>3</sup> G. B. Pant National Institute of Himalayan Environment, Kosi-Katarmal, Almora 263643, India; jckuniyal@gmail.com (J.C.K.); sheetalchaudharyshitu@gmail.com (S.C.); archanabawari123@gmail.com (A.B.)

<sup>4</sup> Aryabhatta Research Institute of Observational Sciences (ARIES), Nainital 263002, India; psrivastava@aries.res.in (P.S.); manish@aries.res.in (M.N.)

<sup>5</sup> G. B. Pant National Institute of Himalayan Environment, Himachal Regional Centre, Mohal-Kullu 175126, India; renu15\_negi@yahoo.co.in (R.L.); isha950414@gmail.com (I.T.)

<sup>6</sup> Environmental Sciences Section, Bose Institute, EN Block, Sector-V, Saltlake, Kolkata 700091, India; monamidutta2509@gmail.com (M.D.); abhijit.boseinst@gmail.com (A.C.)

<sup>7</sup> Department of Civil Engineering, Centre of Environmental Science and Engineering, IIT-Kanpur, Kanpur 201086, India; abhinandan1011@gmail.com

<sup>8</sup> School of Civil and Environmental Engineering, Indian Institute of Technology Mandi, Kamand 175005, India; supriyadey08@gmail.com (S.D.); sayantan@iitmandi.ac.in (S.S.)

\* Correspondence: sudhir@nplindia.org or sudhircsir@gmail.com

**Table S1.** S/N of species and MDL used for calculation of uncertainty at different study sites.

| Species                       | Mohal-Kullu |          | Nainital |          | Darjeeling |          | MDL<br>( $\mu\text{g m}^{-3}$ ) |
|-------------------------------|-------------|----------|----------|----------|------------|----------|---------------------------------|
|                               | S/N         | Category | S/N      | Category | S/N        | Category |                                 |
| OC                            | 6.05        | Strong   | 5.54     | Strong   | 6.0        | Strong   | 0.87                            |
| EC                            | 9.09        | Strong   | 4.27     | Strong   | 4.4        | Strong   | 0.38                            |
| WSOC                          | 5.64        | Weak     | 8.00     | Weak     | 7.4        | Weak     | 0.4                             |
| Na <sup>+</sup>               | 6.54        | Weak     | 1.05     | Weak     | 4.1        | Strong   | 0.34                            |
| NH <sub>4</sub> <sup>+</sup>  | 9.63        | Strong   | 6.65     | Strong   | 5.2        | Strong   | 0.27                            |
| K <sup>+</sup>                | 7.97        | Strong   | 0.84     | Weak     | 1.8        | Strong   | 0.32                            |
| Mg <sup>2+</sup>              | -           | -        | -        | -        | 0.4        | Weak     | 0.18                            |
| Ca <sup>2+</sup>              | -           | -        | -        | -        | 2.0        | Strong   | 0.31                            |
| F <sup>-</sup>                | 6.52        | Strong   | 0.05     | Weak     | 0.1        | Bad      | 0.10                            |
| Cl <sup>-</sup>               | 8.85        | Strong   | 0.47     | Weak     | 1.4        | Strong   | 0.26                            |
| NO <sub>3</sub> <sup>-</sup>  | 8.33        | Strong   | 6.46     | Strong   | 3.3        | Strong   | 0.37                            |
| SO <sub>4</sub> <sup>2-</sup> | 9.07        | Strong   | 8.60     | Strong   | 8.8        | Strong   | 0.23                            |
| B                             | 7.04        | Strong   | 9.67     | Strong   | 9.6        | Strong   | 0.01                            |
| Al                            | 8.76        | Strong   | 6.72     | Strong   | 9.7        | Strong   | 0.18                            |
| P                             | 6.30        | Strong   | 2.87     | Strong   | 3.7        | Strong   | 0.05                            |
| S                             | 8.15        | Weak     | 8.11     | Weak     | 7.4        | Weak     | 0.12                            |
| Ti                            | -           | -        | 4.72     | Strong   | 2.5        | Strong   | 0.03                            |
| Cr                            | 0.05        | Weak     | 9.07     | Strong   | 6.1        | Strong   | 0.02                            |

|    |      |        |      |        |     |        |      |
|----|------|--------|------|--------|-----|--------|------|
| Fe | 4.88 | Strong | 8.60 | Strong | 7.2 | Strong | 0.07 |
| Ni | -    | -      | 2.45 | Strong | 3.2 | Strong | 0.02 |
| Cu | -    | -      | 7.83 | Strong | 3.1 | Strong | 0.01 |
| Zn | 6.99 | Strong | 1.01 | Weak   | 1.7 | Strong | 0.06 |
| Zr | 0.00 | Weak   | 6.24 | Bad    | 3.2 | Strong | 0.01 |
| Mo | -    | -      | 5.47 | Strong |     |        | 0.01 |
| Mn | -    | -      | 2.67 | Strong | -   | -      | 0.02 |
| Br | -    | -      | 4.67 | Strong | -   | -      | 0.01 |
| Mg | 6.68 | Strong | 6.46 | Strong | -   | -      | 0.03 |
| Ca | 8.72 | Strong | 7.62 | Strong | -   | -      | 0.03 |

**Table S2.** Model summary and the results of error estimates at Mohal-Kullu PMF.

| Model summary and the result of BS, DISP and BS-DISP error estimates |               |                         |                   |               |               |          |
|----------------------------------------------------------------------|---------------|-------------------------|-------------------|---------------|---------------|----------|
| No. of base runs: 100                                                |               |                         |                   |               |               |          |
| Base random seed:     13                                             |               |                         |                   |               |               |          |
| Number of factors:     4                                             |               |                         |                   |               |               |          |
| Extra modeling uncertainty (%):   5                                  |               |                         |                   |               |               |          |
| Base run summary table:                                              |               |                         |                   |               |               |          |
| Run #                                                                | Q(Robust)     | Q(True)                 | Converged # Steps |               | Q(true)/Qexp  |          |
| 1                                                                    | 1124.29       | 1124.29                 | Yes               | 189           | 2.007         |          |
| BS-DISP Diag-                                                        |               |                         |                   |               |               |          |
| nostics:                                                             |               |                         |                   |               |               |          |
|                                                                      |               | # of Cases Accepted:    |                   | 94            |               |          |
|                                                                      |               | % of Cases Accepted:    |                   | 94%           |               |          |
|                                                                      |               | Largest Decrease in Q:  |                   | -0.41         |               |          |
|                                                                      |               | %dQ:                    |                   | -0.04         |               |          |
|                                                                      |               | # of Decreases in Q:    |                   | 0             |               |          |
|                                                                      |               | # of Swaps in Best Fit: |                   | 0             |               |          |
|                                                                      |               | # of Swaps in DISP:     |                   | 6             |               |          |
|                                                                      |               | Swaps by Factor:        |                   | 0             | 0             | 0        |
| DISP Diagnos-                                                        |               |                         |                   |               |               |          |
| tics:                                                                |               |                         |                   |               |               |          |
|                                                                      |               | Error Code:             |                   | 0             |               |          |
|                                                                      |               | Largest De-             |                   |               |               |          |
|                                                                      |               | crease in Q:            |                   | -0.056        |               |          |
|                                                                      |               | %dQ:                    |                   | -0.0049       |               |          |
|                                                                      |               | Swaps by Fac-           |                   |               |               |          |
|                                                                      |               | tor:                    |                   | 0             | 0             | 0        |
| BS Mapping:                                                          |               |                         |                   |               |               |          |
|                                                                      | Base Factor 1 |                         | Base Factor 2     | Base Factor 3 | Base Factor 4 | Unmapped |
| Boot Factor 1                                                        | 100           |                         | 0                 | 0             | 0             | 0        |
| Boot Factor 2                                                        | 0             |                         | 98                | 2             | 0             | 0        |
| Boot Factor 3                                                        | 0             |                         | 0                 | 100           | 0             | 0        |
| Boot Factor 4                                                        | 0             |                         | 0                 | 0             | 100           | 0        |

**Table S3.** Model summary and the results of error estimates in PMF at Nainital.

| <b>Model summary and the result of BS, DISP and BS-DISP error estimates</b> |                         |           |          |           |          |              |
|-----------------------------------------------------------------------------|-------------------------|-----------|----------|-----------|----------|--------------|
| **** Base Run Summary                                                       |                         |           |          |           |          |              |
| ****                                                                        |                         |           |          |           |          |              |
| Number of base runs:                                                        | 100                     |           |          |           |          |              |
| Base random seed:                                                           | 92                      |           |          |           |          |              |
| Number of factors:                                                          | 5                       |           |          |           |          |              |
| Extra modeling uncertainty (%):                                             | 2                       |           |          |           |          |              |
| <b>Base run summary table:</b>                                              |                         |           |          |           |          |              |
|                                                                             | Run #                   | Q(Robust) | Q(True)  | Converged | # Steps  | Q(true)/Qexp |
|                                                                             | 1                       | 1303.43   | 1303.43  | Yes       | 1135     | 1.32         |
| <b>BS-DISP Diagnostics:</b>                                                 |                         |           |          |           |          |              |
|                                                                             | # of Cases Accepted:    | 99        |          |           |          |              |
|                                                                             | % of Cases Accepted:    | 99%       |          |           |          |              |
|                                                                             | Largest Decrease in Q:  | -0.18     |          |           |          |              |
|                                                                             | %dQ:                    | -0.01     |          |           |          |              |
|                                                                             | # of Decreases in Q:    | 0         |          |           |          |              |
|                                                                             | # of Swaps in Best Fit: | 0         |          |           |          |              |
|                                                                             | # of Swaps in DISP:     | 1         |          |           |          |              |
|                                                                             | Swaps by Factor:        | 0         | 0        | 0         | 0        | 0            |
| <b>DISP Diagnostics:</b>                                                    |                         |           |          |           |          |              |
|                                                                             | Error Code:             | 0         |          |           |          |              |
|                                                                             | Largest Decrease in Q:  | -0.061    |          |           |          |              |
|                                                                             | %dQ:                    | -0.005    |          |           |          |              |
|                                                                             | Swaps by Factor:        | 0         | 0        | 0         | 0        | 0            |
| <b>BS Mapping:</b>                                                          |                         |           |          |           |          |              |
|                                                                             | Factor 1                | Factor 2  | Factor 3 | Factor 4  | Factor 5 | Unmapped     |
| Boot Factor 1                                                               | 100                     | 0         | 0        | 0         | 0        | 0            |
| Boot Factor 2                                                               | 0                       | 100       | 0        | 0         | 0        | 0            |
| Boot Factor 3                                                               | 0                       | 0         | 100      | 0         | 0        | 0            |
| Boot Factor 4                                                               | 0                       | 0         | 0        | 100       | 0        | 0            |
| Boot Factor 5                                                               | 0                       | 0         | 0        | 0         | 100      | 0            |

**Table S4.** Model summary and the results of error estimates in PMF at Darjeeling.

| Model summary and the result of BS, DISP, and BS-DISP error estimates |                         |              |           |          |              |          |
|-----------------------------------------------------------------------|-------------------------|--------------|-----------|----------|--------------|----------|
| Number of base runs:                                                  | 100                     |              |           |          |              |          |
| Base random seed:                                                     | 73                      |              |           |          |              |          |
| Number of factors:                                                    | 5                       |              |           |          |              |          |
| Extra modeling uncertainty (%):                                       | 2                       |              |           |          |              |          |
| Base run summary table:                                               |                         |              |           |          |              |          |
| Run #                                                                 | Q(Robust)               | Q(True)      | Converged | # Steps  | Q(true)/Qexp |          |
| 1                                                                     | 2099.47                 | 2099.47      | Yes       | 805      | 1.1922       |          |
| BS-DISP Diagnostics:                                                  |                         |              |           |          |              |          |
|                                                                       | # of Cases Accepted:    | 99           |           |          |              |          |
|                                                                       | % of Cases Accepted:    | 99%          |           |          |              |          |
|                                                                       | Largest Decrease in Q:  | -5.781000137 |           |          |              |          |
|                                                                       | %dQ:                    | -0.275361773 |           |          |              |          |
|                                                                       | # of Decreases in Q:    | 0            |           |          |              |          |
|                                                                       | # of Swaps in Best Fit: | 0            |           |          |              |          |
|                                                                       | # of Swaps in DISP:     | 1            |           |          |              |          |
|                                                                       | Swaps by Factor:        | 0            | 0         | 0        | 0            | 0        |
| DISP Diagnostics:                                                     |                         |              |           |          |              |          |
|                                                                       | Error Code:             | 0            |           |          |              |          |
|                                                                       | Largest Decrease in Q:  | -0.005       |           |          |              |          |
|                                                                       | %dQ:                    | -0.000238161 |           |          |              |          |
|                                                                       | Swaps by Factor:        | 0            | 0         | 0        | 0            | 0        |
| BS Mapping:                                                           |                         |              |           |          |              |          |
|                                                                       | Factor 1                | Factor 2     | Factor 3  | Factor 4 | Factor 5     | Unmapped |
| Boot Factor 1                                                         | 100                     | 0            | 0         | 0        | 0            | 0        |
| Boot Factor 2                                                         | 0                       | 100          | 0         | 0        | 0            | 0        |
| Boot Factor 3                                                         | 0                       | 0            | 99        | 1        | 0            | 0        |
| Boot Factor 4                                                         | 0                       | 0            | 0         | 100      | 0            | 0        |
| Boot Factor 5                                                         | 0                       | 0            | 0         | 0        | 100          | 0        |

**Table S5.** Annual and seasonal average concentration of PM<sub>10</sub> and its elemental composition at study sites of IHR.

| Values are in µg m <sup>-3</sup> | Mohal-Kullu   |                  |                  |                    |                        | Nainital    |                  |                  |                    |                        | Darjeeling  |                  |                  |                    |                        |
|----------------------------------|---------------|------------------|------------------|--------------------|------------------------|-------------|------------------|------------------|--------------------|------------------------|-------------|------------------|------------------|--------------------|------------------------|
|                                  | Annual        | Winter (Jan-Feb) | Summer (Mar-May) | Monsoon (Jun-Sept) | Post-monsoon (Oct-Dec) | Annual      | Winter (Jan-Feb) | Summer (Mar-May) | Monsoon (Jun-Sept) | Post-monsoon (Oct-Dec) | Annual      | Winter (Jan-Feb) | Summer (Mar-May) | Monsoon (Jun-Sept) | Post-monsoon (Oct-Dec) |
| Samples (n)                      | n = 76        | n = 5            | n = 8            | n = 34             | n = 29                 | n = 86      | n = 17           | n = 27           | n = 9              | n = 33                 | n = 134     | n = 25           | n = 32           | n = 31             | n = 46                 |
| PM <sub>10</sub>                 | 58 ± 32       | 51 ± 16          | 52 ± 15          | 44 ± 26            | 76 ± 36                | 62 ± 39     | 38 ± 9           | 100 ± 50         | 49 ± 17            | 47 ± 14                | 54 ± 18     | 52 ± 18          | 63 ± 21          | 47 ± 9             | 50 ± 15                |
| B                                | 1.73 ± 1.13   | 1.41 ± 0.24      | 1.26 ± 0.35      | 1.54 ± 1.31        | 2.15 ± 1.03            | 0.4 ± 0.3   | 0.22 ± 0.16      | 0.51 ± 0.38      | 0.65 ± 0.34        | 0.31 ± 0.12            | 0.37 ± 0.23 | 0.29 ± 0.19      | 0.52 ± 0.26      | 0.38 ± 0.20        | 0.24 ± 0.13            |
| Na                               | 2.64 ± 1.67   | 2.19 ± 0.37      | 2.07 ± 0.62      | 2.38 ± 1.92        | 3.22 ± 1.55            | 0.36 ± 0.33 | 0.53 ± 0.31      | 0.28 ± 0.19      | 0.22 ± 0.19        | 0.35 ± 0.43            | 0.05 ± 0.04 | 0.05 ± 0.03      | 0.08 ± 0.05      | 0.05 ± 0.04        | 0.03 ± 0.02            |
| Mg                               | 0.15 ± 0.10   | 0.13 ± 0.10      | 0.22 ± 0.10      | 0.12 ± 0.10        | 0.17 ± 0.09            | 0.42 ± 0.49 | 0.17 ± 0.08      | 0.83 ± 0.60      | 0.62 ± 0.55        | 0.16 ± 0.13            | 0.14 ± 0.15 | 0.20 ± 0.27      | 0.18 ± 0.14      | 0.09 ± 0.08        | 0.11 ± 0.04            |
| Al                               | 1.22 ± 0.70   | 1.08 ± 0.38      | 1.26 ± 0.38      | 1.05 ± 0.81        | 1.44 ± 0.62            | 1.65 ± 1.73 | 0.67 ± 0.32      | 3.07 ± 2.06      | 2.54 ± 1.91        | 0.75 ± 0.54            | 0.85 ± 0.75 | 0.78 ± 0.34      | 0.91 ± 0.64      | 1.06 ± 1.37        | 0.72 ± 0.27            |
| P                                | 0.01 ± 0.001  | 0.006 ± 0.005    | 0.009 ± 0.004    | 0.005 ± 0.004      | 0.006 ± 0.004          | 0.05 ± 0.06 | 0.01 ± 0.008     | 0.10 ± 0.07      | 0.05 ± 0.03        | 0.02 ± 0.01            | 0.06 ± 0.30 | 0.21 ± 0.67      | 0.03 ± 0.02      | 0.02 ± 0.01        | 0.02 ± 0.01            |
| S                                | 1.02 ± 1.01   | 0.91 ± 0.37      | 1.20 ± 0.33      | 1.13 ± 1.43        | 0.84 ± 0.38            | 1.36 ± 0.71 | 1.13 ± 0.57      | 1.66 ± 0.66      | 1.80 ± 0.97        | 1.09 ± 0.60            | 1.12 ± 0.72 | 1.27 ± 0.76      | 1.67 ± 0.75      | 0.66 ± 0.47        | 0.97 ± 0.54            |
| Cl                               | 0.44 ± 0.59   | 0.64 ± 0.22      | 0.23 ± 0.11      | 0.20 ± 0.16        | 0.78 ± 0.84            | 0.40 ± 0.44 | 0.58 ± 0.42      | 0.358 ± 0.40     | 0.09 ± 0.009       | 0.43 ± 0.51            | 0.12 ± 0.13 | 0.17 ± 0.22      | 0.07 ± 0.05      | 0.08 ± 0.07        | 0.13 ± 0.10            |
| K                                | 0.91 ± 0.55   | 0.73 ± 0.20      | 0.84 ± 0.23      | 0.81 ± 0.65        | 1.10 ± 0.48            | 1.30 ± 1.09 | 0.56 ± 0.26      | 2.20 ± 1.36      | 1.62 ± 1.06        | 0.86 ± 0.39            | 0.60 ± 0.37 | 0.71 ± 0.30      | 0.78 ± 0.44      | 0.29 ± 0.21        | 0.62 ± 0.32            |
| Ca                               | 0.49 ± 0.29   | 0.39 ± 0.14      | 0.50 ± 0.15      | 0.42 ± 0.34        | 0.58 ± 0.26            | 1.81 ± 1.88 | 0.88 ± 0.63      | 3.32 ± 2.14      | 2.22 ± 1.93        | 0.95 ± 1.16            | 0.57 ± 0.38 | 0.53 ± 0.21      | 0.65 ± 0.45      | 0.41 ± 0.25        | 0.62 ± 0.43            |
| Ti                               |               |                  |                  |                    |                        | 0.11 ± 0.09 | 0.05 ± 0.02      | 0.19 ± 0.11      | 0.19 ± 0.07        | 0.05 ± 0.03            | 0.06 ± 0.02 | 0.06 ± 0.01      | 0.07 ± 0.03      | 0.05 ± 0.02        | 0.05 ± 0.01            |
| Cr                               | 0.01 ± 0.001  | 0.004 ± 0.001    | 0.006 ± 0.001    | 0.005 ± 0.004      | 0.007 ± 0.003          | 0.13 ± 0.01 | 0.14 ± 0.01      | 0.11 ± 0.02      | 0.13 ± 0.008       | 0.13 ± 0.01            | 0.13 ± 0.10 | 0.15 ± 0.22      | 0.09 ± 0.01      | 0.13 ± 0.03        | 0.13 ± 0.02            |
| Fe                               | 0.19 ± 0.13   | 0.16 ± 0.12      | 0.28 ± 0.11      | 0.16 ± 0.12        | 0.22 ± 0.11            | 1.42 ± 1.16 | 0.73 ± 0.29      | 2.41 ± 1.27      | 2.01 ± 1.31        | 0.80 ± 0.49            | 0.61 ± 0.26 | 0.62 ± 0.23      | 0.70 ± 0.39      | 0.49 ± 0.21        | 0.60 ± 0.15            |
| Ni                               | -             | -                | -                | -                  | -                      | 0.06 ± 0.02 | 0.03 ± 0.004     | 0.10 ± 0.36      | 0.03 ± 0.003       | 0.03 ± 0.006           | 0.04 ± 0.01 | 0.05 ± 0.02      | 0.04 ± 0.01      | 0.04 ± 0.01        | 0.03 ± 0.10            |
| Cu                               | -             | -                | -                | -                  | -                      | 0.13 ± 0.01 | 0.04 ± 0.03      | 0.23 ± 0.18      | 0.15 ± 0.07        | 0.09 ± 0.07            | 0.03 ± 0.02 | -                | -                | 0.04 ± 0.02        | 0.02 ± 0.003           |
| Zn                               | 0.29 ± 0.18   | 0.23 ± 0.06      | 0.26 ± 0.07      | 0.26 ± 0.21        | 0.34 ± 0.14            | 0.08 ± 0.07 | 0.10 ± 0.07      | 0.07 ± 0.08      | 0.03 ± 0.009       | 0.09 ± 0.06            | 0.09 ± 0.03 | 0.09 ± 0.03      | 0.08 ± 0.02      | 0.08 ± 0.04        | 0.09 ± 0.03            |
| Zr                               | 0.005 ± 0.004 | 0.001 ± 0.001    | 0.001 ± 0.0001   | 0.0001 ± 0.0001    | 0.001 ± 0.001          | 0.11 ± 0.11 | 0.02 ± 0.003     | 0.21 ± 0.10      | 0.17 ± 0.11        | 0.06 ± 0.09            | 0.04 ± 0.01 | -                | 0.05 ± 0.01      | 0.04 ± 0.01        | 0.03 ± 0.009           |

|    |             |             |             |             |             |             |              |             |              |             |             |             |             |             |             |
|----|-------------|-------------|-------------|-------------|-------------|-------------|--------------|-------------|--------------|-------------|-------------|-------------|-------------|-------------|-------------|
| Mo | -           | -           | -           | -           | -           | 0.05 ± 0.06 | 0.04 ± 0.01  | 0.07 ± 0.11 | 0.03 ± 0.01  | 0.04 ± 0.01 | 0.05 ± 0.06 | 0.06 ± 0.01 | 0.05 ± 0.01 | 0.06 ± 0.01 | 0.05 ± 0.01 |
| Pb | -           | -           | -           | -           | -           | 0.06 ± 0.02 | 0.05 ± 0.008 | 0.07 ± 0.04 | 0.06 ± 0.009 | 0.05 ± 0.08 | 0.06 ± 0.02 | -           | -           | 0.12 ± 0.13 | 0.21 ± 0.23 |
| Mn | -           | -           | -           | -           | -           | 0.08 ± 0.14 | 0.05 ± 0.04  | 0.11 ± 0.19 | 0.08 ± 0.05  | 0.06 ± 0.16 | 0.08 ± 0.14 | 0.05 ± 0.01 | 0.05 ± 0.02 | 0.04 ± 0.02 | 0.04 ± 0.02 |
| Ba | 1.13 ± 0.69 | 0.90 ± 0.22 | 1.03 ± 0.28 | 1.01 ± 0.83 | 1.35 ± 0.58 | -           | -            | -           | -            | -           | -           | -           | -           | -           | -           |

average ± Standard deviation, all values are in  $\mu\text{g m}^{-3}$ .

**Table S6.** Diagnostic mass ratios of carbonaceous and water soluble inorganic ionic components of  $\text{PM}_{10}$  at different study sites.

|                                                              | Mohal-Kullu |         |         |          |               | Nainital |         |         |          |               | Darjeeling |         |         |          |               |
|--------------------------------------------------------------|-------------|---------|---------|----------|---------------|----------|---------|---------|----------|---------------|------------|---------|---------|----------|---------------|
|                                                              | An-nual     | Win-ter | Sum-mer | Mon-soon | Post Mon-soon | An-nual  | Win-ter | Sum-mer | Mon-soon | Post Mon-soon | An-nual    | Win-ter | Sum-mer | Mon-soon | Post Mon-soon |
| OC/EC                                                        | 2.95        | 2.61    | 2.98    | 2.84     | 3.14          | 3.44     | 2.33    | 3.84    | 3.4      | 3.70          | 2.60       | 2.04    | 1.74    | 3.04     | 3.21          |
| WSOC/OC                                                      | 0.68        | 0.55    | 0.42    | 0.82     | 0.60          | 0.72     | 0.74    | 0.75    | 0.7      | 0.68          | 0.68       | 0.74    | 0.61    | 0.59     | 0.76          |
| SOC/OC                                                       | 0.30        | 0.14    | 0.31    | 0.25     | 0.34          | 0.43     | 0.23    | 0.50    | 0.4      | 0.42          | 0.43       | 0.34    | 0.23    | 0.42     | 0.49          |
| nss K <sup>+</sup> /OC                                       | 0.05        | 0.03    | 0.03    | 0.05     | 0.05          | 0.09     | 0.10    | 0.09    | 0.12     | 0.09          | 0.10       | 0.10    | 0.13    | 0.08     | 0.10          |
| nss K <sup>+</sup> /EC                                       | 0.14        | 0.08    | 0.08    | 0.16     | 0.15          | 0.31     | 0.23    | 0.31    | 0.39     | 0.32          | 0.26       | 0.21    | 0.22    | 0.22     | 0.33          |
| Cl <sup>-</sup> /Na <sup>+</sup>                             | 0.76        | 0.77    | 0.56    | 0.77     | 0.81          | 0.97     | 1.23    | 1.06    | 0.63     | 0.85          | 0.50       | 0.51    | 0.61    | 0.48     | 0.44          |
| NH <sub>4</sub> <sup>+</sup> / SO <sub>4</sub> <sup>2-</sup> | 0.68        | 0.73    | 0.63    | 0.63     | 0.75          | 0.45     | 0.45    | 0.44    | 0.37     | 0.49          | 0.50       | 0.62    | 0.58    | 0.41     | 0.45          |
| NO <sub>3</sub> <sup>-</sup> / SO <sub>4</sub> <sup>2-</sup> | 0.97        | 1.17    | 1.00    | 0.92     | 0.99          | 0.52     | 0.53    | 0.53    | 0.52     | 0.51          | 0.50       | 0.49    | 0.51    | 0.37     | 0.57          |
| Mg <sup>2+</sup> /Ca <sup>2+</sup>                           | 0.32        | 0.27    | 0.10    | 0.55     | 0.11          | 0.59     | 0.18    | 1.23    | 0.94     | 0.18          | 0.23       | 0.20    | 0.21    | 0.19     | 0.28          |
| K <sup>+</sup> / NH <sub>4</sub> <sup>+</sup>                | 0.34        | 0.28    | 0.35    | 0.31     | 0.38          | 0.33     | 0.39    | 0.30    | 0.40     | 0.31          | 0.77       | 0.40    | 0.29    | 0.62     | 1.39          |
| Cl <sup>-</sup> /NO <sub>3</sub> <sup>-</sup>                | 0.80        | 0.73    | 0.71    | 0.77     | 0.87          | 0.18     | 0.23    | 0.21    | 0.07     | 0.17          | 0.34       | 0.28    | 0.32    | 0.47     | 0.31          |
| Ca <sup>2+</sup> / NO <sub>3</sub> <sup>-</sup>              | 0.66        | 0.78    | 0.69    | 0.59     | 0.71          | 0.47     | 0.41    | 0.50    | 0.40     | 0.48          | 0.50       | 0.47    | 0.51    | 0.69     | 0.38          |
| K <sup>+</sup> / Ca <sup>2+</sup>                            | 0.59        | 0.26    | 0.36    | 0.78     | 0.49          | 2.94     | 1.15    | 6.17    | 3.08     | 1.17          | 1.70       | 1.76    | 0.91    | 0.55     | 2.99          |
| K <sup>+</sup> / SO <sub>4</sub> <sup>2-</sup>               | 0.22        | 0.21    | 0.23    | 0.17     | 0.28          | 0.12     | 0.12    | 0.13    | 0.13     | 0.12          | 0.22       | 0.24    | 0.13    | 0.11     | 0.35          |
| K <sup>+</sup> /NO <sub>3</sub> <sup>-</sup>                 | 0.22        | 0.18    | 0.22    | 0.18     | 0.27          | 0.25     | 0.27    | 0.24    | 0.24     | 0.25          | 0.51       | 0.44    | 0.28    | 0.34     | 0.84          |
| K <sup>+</sup> / Cl <sup>-</sup>                             | 0.29        | 0.25    | 0.42    | 0.25     | 0.31          | 2.37     | 1.87    | 2.08    | 3.52     | 2.55          | 2.98       | 3.98    | 1.76    | 1.01     | 4.62          |

Table S7. PCA factor loadings of PM<sub>10</sub> at different locations of IHR.

|                               | Mohal-Kullu |             |                             |             |             | Nainital    |             |             |             |       | Darjeeling  |             |             |             |             |             |    |
|-------------------------------|-------------|-------------|-----------------------------|-------------|-------------|-------------|-------------|-------------|-------------|-------|-------------|-------------|-------------|-------------|-------------|-------------|----|
|                               | PC1         | PC2         | PC3                         | PC4         | PC5         | PC1         | PC2         | PC3         | PC4         | PC5   | PC1         | PC2         | PC3         | PC4         | PC5         | PC6         |    |
| OC                            | -0.03       | -0.01       | <b>0.67</b>                 | <b>0.55</b> | -0.02       | 0.32        | <b>0.83</b> | 0.23        | 0.15        | 0.18  | 0.25        | 0.10        | <b>0.69</b> | 0.18        | <b>0.35</b> | 0.01        |    |
| EC                            | <b>0.39</b> | 0.18        | <b>0.62</b>                 | <b>0.43</b> | -0.10       | -0.12       | <b>0.73</b> | 0.40        | <b>0.37</b> | 0.13  | 0.05        | 0.28        | <b>0.81</b> | <b>0.43</b> | <b>0.27</b> | 0.26        |    |
| WSOC                          | -0.06       | 0.19        | <b>0.82</b>                 | -0.04       | 0.05        | 0.32        | <b>0.78</b> | 0.33        | 0.28        | 0.19  |             |             |             |             |             |             |    |
| Na <sup>+</sup>               | 0.17        | 0.08        | <b>0.55</b>                 | 0.10        | <b>0.33</b> | 0.41        | -0.03       | 0.07        | <b>0.54</b> | 0.59  | 0.11        | 0.03        | -0.11       | 0.29        | -0.26       | <b>0.60</b> |    |
| NH <sub>4</sub> <sup>+</sup>  | 0.04        | <b>0.95</b> | 0.08                        | 0.09        | -0.08       | 0.18        | 0.28        | <b>0.86</b> | -0.03       | 0.02  | 0.24        | <b>0.86</b> | 0.25        | 0.10        | 0.00        | 0.14        |    |
| K <sup>+</sup>                | 0.58        | 0.28        | <b>0.44</b>                 | 0.08        | 0.20        | 0.33        | <b>0.70</b> | 0.41        | 0.09        | 0.10  | 0.11        | 0.40        | <b>0.61</b> | 0.29        | -0.19       | -0.04       |    |
| Mg <sup>2+</sup>              | 0.06        | -0.08       | 0.00                        | -0.01       | <b>0.92</b> | -           | -           | -           | -           | -     | 0.08        | 0.10        | 0.21        | <b>0.74</b> | 0.12        | 0.08        |    |
| Ca <sup>2+</sup>              | <b>0.37</b> | 0.05        | <b>0.64</b>                 | -0.04       | <b>0.35</b> | -           | -           | -           | -           | -     | <b>0.34</b> | 0.45        | -0.01       | <b>0.58</b> | -0.13       | 0.23        |    |
| F <sup>-</sup>                | <b>0.69</b> | 0.29        | <b>0.45</b>                 | -0.02       | -0.05       |             |             |             |             |       | 0.09        | 0.18        | 0.23        | <b>0.81</b> | -0.03       | <b>0.42</b> |    |
| Cl <sup>-</sup>               | <b>0.69</b> | 0.30        | <b>0.37</b>                 | -0.18       | <b>0.34</b> | 0.57        | 0.21        | 0.09        | -0.04       | 0.49  | 0.22        | <b>0.86</b> | 0.17        | <b>0.43</b> | <b>0.50</b> | 0.02        |    |
| NO <sub>3</sub> <sup>-</sup>  | <b>0.19</b> | <b>0.90</b> | 0.21                        | 0.05        | -0.02       | 0.30        | 0.32        | <b>0.84</b> | 0.05        | -0.05 | 0.26        | <b>0.89</b> | 0.15        | 0.12        | 0.08        | 0.07        |    |
| SO <sub>4</sub> <sup>2-</sup> | <b>0.29</b> | <b>0.89</b> | 0.12                        | 0.10        | -0.01       | 0.30        | 0.17        | <b>0.84</b> | 0.17        | -0.09 | 0.18        | 0.21        | -0.04       | 0.17        | <b>0.49</b> | 0.49        |    |
| B                             | <b>0.84</b> | 0.11        | 0.09                        | 0.28        | 0.00        | 0.46        | <b>0.60</b> | 0.41        | 0.02        | -0.06 | <b>0.80</b> | 0.22        | -0.11       | 0.25        | -0.24       | 0.06        |    |
| Al                            | <b>0.68</b> | 0.22        | 0.07                        | <b>0.66</b> | -0.02       | 0.90        | 0.25        | 0.25        | 0.21        | 0.09  | <b>0.87</b> | 0.13        | -0.06       | 0.15        | -0.10       | 0.07        |    |
| P                             | -           | -           | -                           | -           | -           | <b>0.78</b> | <b>0.40</b> | 0.23        | 0.25        | 0.23  |             |             |             |             |             |             |    |
| S                             | -0.06       | -0.09       | 0.21                        | <b>0.70</b> | -0.06       | <b>0.34</b> | 0.18        | 0.60        | <b>0.43</b> | -0.03 |             |             |             |             |             |             |    |
| Ti                            | -           | -           | -                           | -           | -           | <b>0.91</b> | 0.19        | 0.21        | 0.22        | 0.03  | <b>0.78</b> | 0.24        | 0.20        | -0.08       | 0.16        | 0.10        |    |
| Cr                            | -           | -           | -                           | -           | -           | -0.31       | -0.19       | -0.12       | -0.07       | -0.66 | 0.02        | -0.10       | -0.27       | 0.08        | -0.05       | -0.81       |    |
| Fe                            | 0.22        | 0.26        | -0.13                       | <b>0.83</b> | 0.04        | <b>0.89</b> | 0.18        | 0.27        | 0.23        | 0.10  | <b>0.83</b> | 0.21        | 0.19        | 0.10        | 0.06        | 0.13        |    |
| Ni                            | -           | -           | -                           | -           | -           | -           | -           | -           | -           | -     |             |             |             |             |             |             |    |
| Cu                            | -           | -           | -                           | -           | -           | 0.31        | 0.18        | 0.26        | <b>0.77</b> | 0.10  | -0.01       | -0.04       | -0.14       | -0.09       | <b>0.82</b> | -0.13       |    |
| Zn                            | <b>0.78</b> | 0.25        | 0.03                        | <b>0.48</b> | -0.01       | -0.13       | -0.25       | 0.37        | <b>0.52</b> | 0.39  | 0.61        | 0.11        | <b>0.34</b> | <b>0.34</b> | -0.05       | -0.26       |    |
| Zr                            | -           | -           | -                           | -           | -           | -           | -           | -           | -           | -     | -0.11       | -0.06       | -0.17       | 0.08        | <b>0.84</b> | 0.03        |    |
| Ba                            | -0.57       | 0.13        | <b>0.35</b>                 | 0.13        | -0.04       | -           | -           | -           | -           | -     | -           | -           | -           | -           | -           | -           |    |
| Mn                            | -           | -           | -                           | -           | -           | -           | -           | -           | -           | -     | -           | -           | -           | -           | -           | -           |    |
| Br                            | -           | -           | -                           | -           | -           | 0.09        | 0.05        | -0.28       | 0.08        | 0.79  | -           | -           | -           | -           | -           | -           |    |
| Mo                            |             |             |                             |             |             | 0.39        | <b>0.63</b> | -0.12       | -0.28       | -0.05 | -           | -           | -           | -           | -           | -           |    |
| Mg                            |             |             |                             |             |             | <b>0.91</b> | 0.27        | 0.20        | 0.15        | 0.49  | -           | -           | -           | -           | -           | -           |    |
| Ca                            |             |             |                             |             |             | <b>0.92</b> | 0.16        | 0.18        | 0.15        | 0.12  | -           | -           | -           | -           | -           | -           |    |
| Variance                      | 37.0        | 11.6        | 11.1                        | 10.0        | 5.7         | 50.3        | 11.4        | 7.5         | 6.0         | 5.4   | 33.56       | 12.54       | 9.18        | 6.02        | 5.99        | 5.34        |    |
| Eigen-value                   | 6.7         | 2.1         | 2.0                         | 1.8         | 1.0         | 11.1        | 2.5         | 1.6         | 1.3         | 1.2   | 7.38        | 2.76        | 2.02        | 1.32        | 1.32        | 1.18        |    |
| % Contribution                | 8.7         | 16.7        | 34.8                        | 37.7        | 2.0         | 25.1        | 19.6        | 30.8        | 15.2        | 9.4   | 31.2        | 21.4        | 27.5        | 12.3        | 4.5         | 3.0         |    |
| Source                        | VE          | SA          | Combus-<br>tion<br>(BB+FFC) |             | SD          | SMS         | SD          | BB          | SA          | VE    | SMS         | SD/CD/RD    | SA          | BB          | VE          | FFC/CC      | SS |

**Table S8.** Source composition of PM<sub>10</sub> sources by UNMIX at different study sites.

|                               | Mohal-Kullu |            |       |       | Nainital |       |       |       |       | Darjeeling |       |       |       |      |
|-------------------------------|-------------|------------|-------|-------|----------|-------|-------|-------|-------|------------|-------|-------|-------|------|
|                               | 1           | 2          | 3     | 4     | 1        | 2     | 3     | 4     | 5     | 1          | 2     | 3     | 4     | 5    |
| OC                            | -0.18       | 3.14       | 4.21  | 1.47  | 0.39     | 0.30  | 1.18  | 1.34  | 1.39  | 0.36       | -0.53 | 0.88  | 3.47  | 0.83 |
| EC                            | -0.18       | 2.03       | 1.11  | 0.61  | 0.28     | -0.18 | 0.16  | 0.59  | 0.72  | 0.12       | 0.12  | 0.49  | 1.18  | 0.29 |
| WSOC                          | 0.51        | 1.80       | 1.15  | 0.79  | 0.56     | -0.01 | 0.58  | 1.36  | 0.85  | 0.43       | -0.65 | 0.39  | 2.95  | 0.42 |
| B                             | 0.16        | 0.72       | 0.24  | 0.43  |          |       |       |       |       | 0.02       | 0.14  | 0.21  | -0.17 | 0.13 |
| Al                            | 0.07        | 0.40       | 0.30  | 0.39  | -0.07    | 0.03  | 1.12  | 0.27  | 0.08  | 0.08       | 0.09  | 0.05  | 0.13  | 0.47 |
| P                             |             |            |       |       |          |       |       |       |       | 0.002      | 0.003 | 0.003 | 0.003 | 0.02 |
| S                             |             |            |       |       |          |       |       |       |       |            |       |       |       |      |
| Ti                            |             |            |       |       |          | 0.003 | 0.08  | 0.01  | 0.01  | 0.001      | 0.01  | 0.01  | 0.01  | 0.02 |
| Fe                            | 0.01        | 0.02       | 0.08  | 0.09  | -0.001   | -0.06 | 0.80  | 0.23  | 0.25  | 0.04       | 0.05  | 0.13  | 0.11  | 0.29 |
| Zn                            | 0.02        | 0.10       | 0.06  | 0.09  | 0.003    | 0.03  | 0.01  | -0.04 | 0.08  | -0.002     | 0.001 | 0.02  | 0.03  | 0.03 |
| Zr                            | 0.00        | 0.00       | 0.00  | 0.00  | 0.11     | -0.01 | 0.01  | 0.01  | -0.01 | -0.004     | 0.004 | 0.03  | 0.00  | 0.01 |
| Cr                            | 0.00        | 0.00       | 0.00  | 0.00  |          |       |       |       |       | -0.004     | -0.01 | 0.05  | 0.05  | 0.03 |
| Mg                            |             |            |       |       | -0.002   | 0.01  | 0.34  | 0.01  | 0.01  | 0.02       | 0.02  | 0.01  | -0.01 | 0.08 |
| Ca                            |             |            |       |       | -0.22    | 0.14  | 1.61  | -0.15 | 0.25  | 0.08       | 0.03  | 0.06  | 0.09  | 0.30 |
| Mo                            |             |            |       |       | 0.01     | 0.01  | 0.002 | -0.01 | 0.02  | -0.004     | 0.002 | 0.03  | 0.01  | 0.02 |
| Na <sup>+</sup>               | 0.16        | 0.66       | 0.52  | 0.51  | -0.05    | 0.37  | 0.07  | 0.06  | -0.03 | 0.04       | 0.07  | 0.57  | 0.16  | 0.65 |
| NH <sub>4</sub> <sup>+</sup>  | 0.02        | 0.55       | 0.16  | 1.04  | 0.20     | 0.03  | 0.44  | 0.07  | 0.92  | 0.03       | 2.87  | 0.07  | -0.24 | 0.29 |
| K <sup>+</sup>                | 0.02        | 0.51       | -0.03 | -0.04 | 0.03     | 0.02  | 0.10  | 0.06  | 0.21  | 0.12       | -0.03 | 0.11  | 0.42  | 0.02 |
| Mg <sup>2+</sup>              | 0.21        | -0.02      | 0.01  | 0.01  |          |       |       |       |       |            |       |       |       |      |
| Ca <sup>2+</sup>              | 0.21        | 0.98       | 0.12  | -0.13 |          |       |       |       |       |            |       |       |       |      |
| F <sup>-</sup>                | 0.01        | 0.05       | 0.00  | 0.02  |          |       |       |       |       |            |       |       |       |      |
| Cl <sup>-</sup>               | 0.11        | 1.15       | 0.02  | 0.22  | 0.06     | 0.07  | 0.03  | -0.07 | 0.12  | 0.57       | -0.02 | 0.03  | -0.02 | 0.03 |
| NO <sub>3</sub> <sup>-</sup>  | 0.10        | 0.96       | 0.19  | 0.94  | 0.17     | -0.09 | 0.65  | 0.17  | 1.04  | 0.33       | 1.79  | 0.14  | 0.02  | 0.06 |
| SO <sub>4</sub> <sup>2-</sup> | 0.13        | 1.12       | 0.08  | 1.21  | 0.06     | 0.02  | 1.37  | 0.33  | 1.93  | -0.38      | 5.12  | 1.24  | -1.05 | 0.71 |
| % Contribution                | 4.4         | 45.1       | 26.2  | 24.3  | 6.7      | 3.0   | 37.4  | 18.6  | 34.3  | 6.8        | 33.2  | 16.6  | 26.2  | 17.3 |
| Source                        | SMS         | Combustion | SD    | SA    | VE       | SMS   | SD    | BB    | SA    | CC         | SA    | VE    | BB    | SD   |



**Table S9.** Percent contribution of PM<sub>10</sub> sources by PMF at different study sites.

|                               | Mohal-Kullu |      |      |      | Nainital |      |      |      |      | Darjeeling |      |      |      |      |
|-------------------------------|-------------|------|------|------|----------|------|------|------|------|------------|------|------|------|------|
|                               | 1           | 2    | 3    | 4    | 1        | 2    | 3    | 4    | 5    | 1          | 2    | 3    | 4    | 5    |
| OC                            | 41          | 7    | 38   | 14   | 18       | 23   | 13   | 18   | 28   | 10         | 10   | 56   | 12   | 11   |
| EC                            | 41          | 9    | 32   | 18   | 0        | 28   | 26   | 14   | 32   | 11         | 0    | 43   | 27   | 19   |
| WSOC                          | 38          | 14   | 46   | 2    | 14       | 17   | 23   | 16   | 30   | 12         | 13   | 63   | 0    | 12   |
| Na <sup>+</sup>               | 39          | 8    | 41   | 12   | 29       | 37   | 3    | 25   | 6    | 3          | 29   | 36   | 28   | 3    |
| NH <sub>4</sub> <sup>+</sup>  | 0           | 54   | 30   | 15   | 15       | 60   | 11   | 4    | 11   | 0          | 5    | 0    | 10   | 85   |
| K <sup>+</sup>                | 8           | 6    | 86   | 0    | 11       | 30   | 21   | 19   | 19   | 15         | 10   | 53   | 10   | 13   |
| Mg <sup>2+</sup>              | -           | -    | -    | -    | -        | -    | -    | -    | -    | 24         | 30   | 23   | 23   | 0    |
| Ca <sup>2+</sup>              | -           | -    | -    | -    | -        | -    | -    | -    | -    | 9          | 25   | 34   | 20   | 12   |
| F <sup>-</sup>                | 39          | 8    | 53   | 0    | 9        | 3    | 16   | 52   | 19   |            |      |      |      |      |
| Cl <sup>-</sup>               | 31          | 19   | 44   | 6    | 11       | 9    | 8    | 53   | 18   | 13         | 15   | 51   | 14   | 7    |
| NO <sub>3</sub> <sup>-</sup>  | 12          | 39   | 35   | 14   | 20       | 51   | 7    | 7    | 15   | 14         | 2    | 16   | 10   | 58   |
| SO <sub>4</sub> <sup>2-</sup> | 6           | 48   | 32   | 14   | 21       | 52   | 3    | 8    | 15   | 55         | 7    | 0    | 6    | 32   |
| Mg                            | 17          | 1    | 29   | 53   | 70       | 0    | 13   | 3    | 14   |            |      |      |      |      |
| Ca                            | 29          | 5    | 32   | 33   | 76       | 1    | 3    | 6    | 14   |            |      |      |      |      |
| B                             | 34          | 8    | 42   | 16   | 15       | 5    | 80   | 0    | 0    | 0          | 11   | 0    | 86   | 3    |
| Al                            | 32          | 5    | 29   | 34   | 67       | 1    | 13   | 1    | 17   | 1          | 88   | 0    | 8    | 4    |
| P                             | 10          | 3    | 27   | 60   | 57       | 3    | 11   | 3    | 27   | 0          | 74   | 5    | 17   | 4    |
| S                             | 23          | 1    | 15   | 61   | 22       | 17   | 35   | 11   | 15   | 5          | 15   | 23   | 44   | 12   |
| Ti                            | -           | -    | -    | -    | 63       | 2    | 13   | 6    | 16   | 2          | 38   | 29   | 25   | 6    |
| Cr                            | 32          | 9    | 35   | 24   | 4        | 17   | 16   | 51   | 12   | 0          | 9    | 69   | 22   | 0    |
| Fe                            | 19          | 0    | 30   | 51   | 61       | 5    | 10   | 10   | 15   | 1          | 65   | 16   | 15   | 4    |
| Ni                            | -           | -    | -    | -    | 11       | 19   | 14   | 44   | 11   | 0          | 21   | 44   | 31   | 3    |
| Cu                            | -           | -    | -    | -    | 16       | 0    | 0    | 0    | 84   | 2          | 11   | 54   | 29   | 4    |
| Zn                            | 33          | 7    | 34   | 26   | 1        | 51   | 0    | 47   | 0    | 3          | 27   | 47   | 17   | 5    |
| Zr                            | 67          | 0    | 9    | 25   | -        | -    | -    | -    | -    | 0          | 5    | 52   | 43   | 1    |
| Mo                            | -           | -    | -    | -    | 0        | 10   | 11   | 63   | 16   |            |      |      |      |      |
| Mn                            | -           | -    | -    | -    | 35       | 2    | 15   | 31   | 18   | -          | -    | -    | -    | -    |
| Br                            | -           | -    | -    | -    | 6        | 0    | 16   | 62   | 17   | -          | -    | -    | -    | -    |
| Ba                            | 69          | 26   | 0    | 5    | -        | -    | -    | -    | -    | -          | -    | -    | -    | -    |
| % Contribution                | 29.5        | 13.2 | 34.3 | 23.0 | 26.1     | 17.8 | 15.2 | 22.1 | 18.8 | 8.2        | 23.2 | 32.5 | 22.6 | 13.5 |
| Source                        | VE          | SA   | BB   | SD   | SD       | SA   | BB   | FFC  | VE   | CC         | SD   | BB   | VE   | SA   |

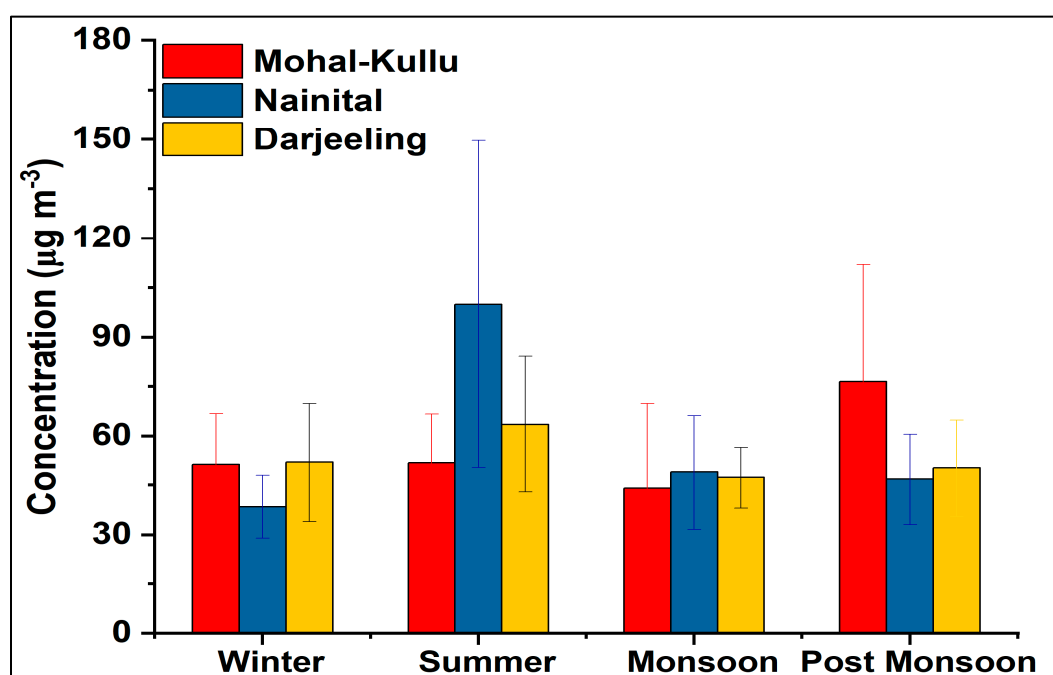

Figure S1. Seasonal variations in the concentration of PM<sub>10</sub> at different study sites (in µg m<sup>-3</sup>).

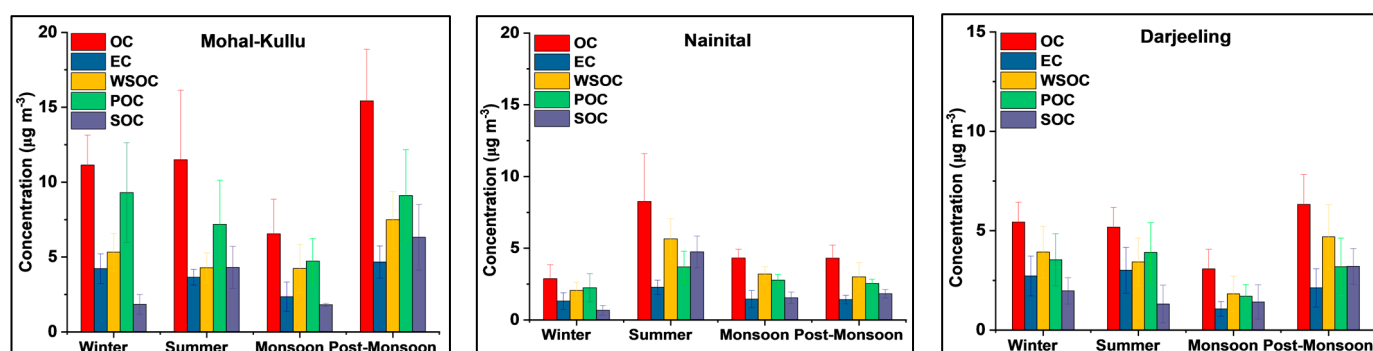

Figure S2. Seasonal variations in the concentration of carbonaceous components (OC, EC, WSOC, POC, SOC) of PM<sub>10</sub> at different study sites (in µg m<sup>-3</sup>).

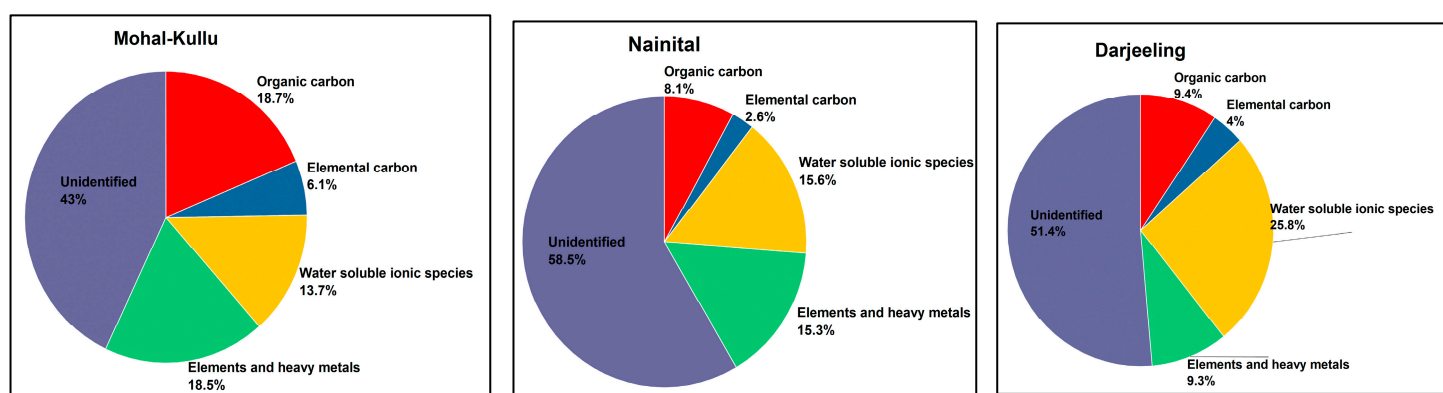

Figure S3. Pie chart showing percentage contribution of analyzed species to PM<sub>10</sub> at study sites in IHR.

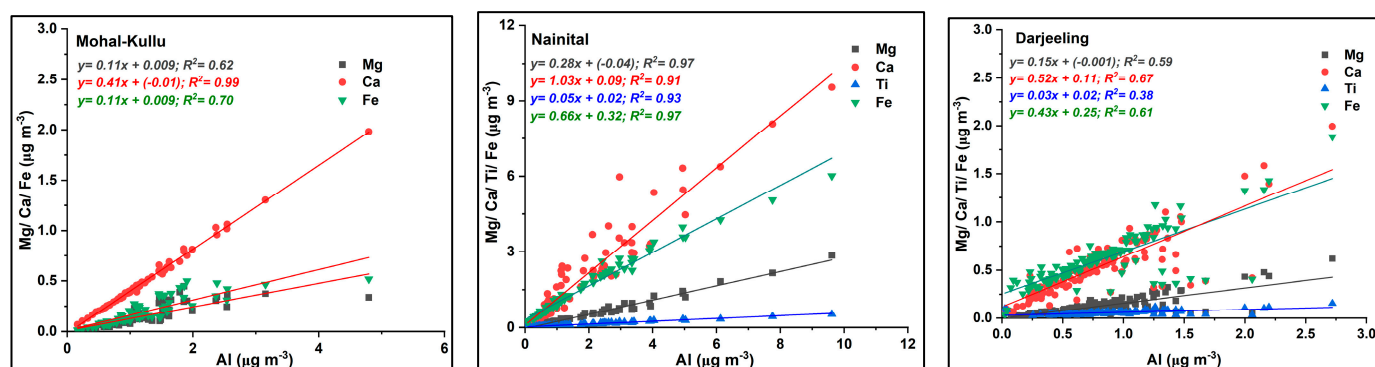

Figure S4. Scatter plots between crustal elements Al with Mg/Ca/Fe, and Ti of PM<sub>10</sub> at different study sites.

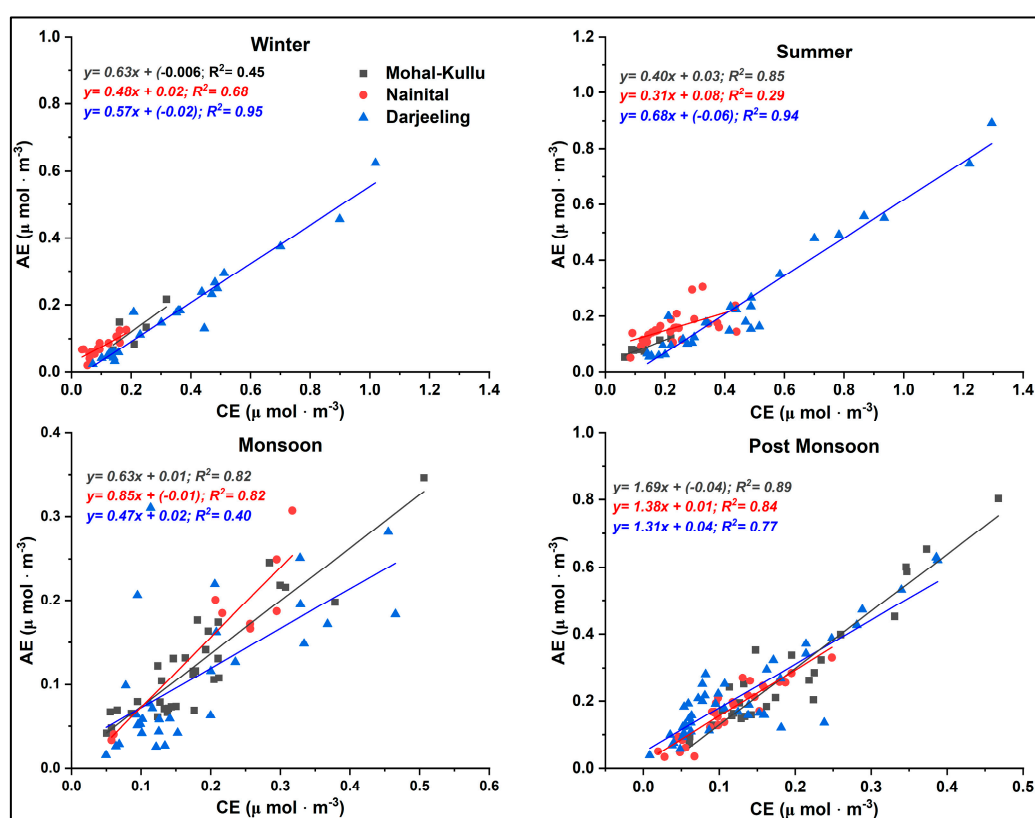

Figure S5. Seasonal CE/AE ratio for aerosol acidity at study sites.

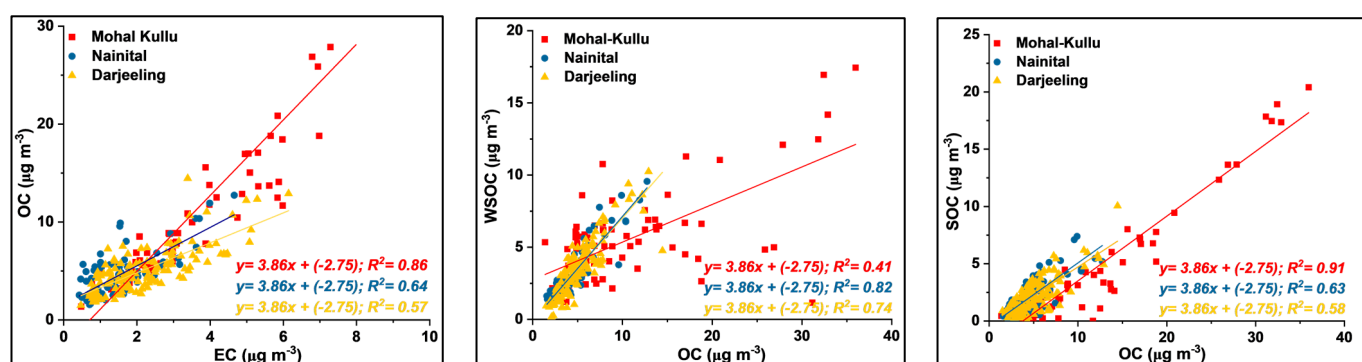

Figure S6. Scatter plots between OC/EC, WSOC/OC, SOC/OC of PM<sub>10</sub> at different study sites.
